# Supplementary material for: CRISPRi-mediated functional analysis of NKX2-1-binding sites in the lung
Source: PubMed Central journal article supplement (PMC8115294; doi:10.1038/s42003-021-02083-4), 2021-05-12
Supplement: 42003_2021_2083_MOESM1_ESM.pdf [file 42003_2021_2083_MOESM1_ESM.pdf]

## **Supplementary Information**

CRISPRi-mediated functional analysis of NKX2-1-binding sites in the lung

William Stuart, Iris M. Fink-Baldauf, Koichi Tomoshige, Minzhe Guo and

Yutaka Maeda

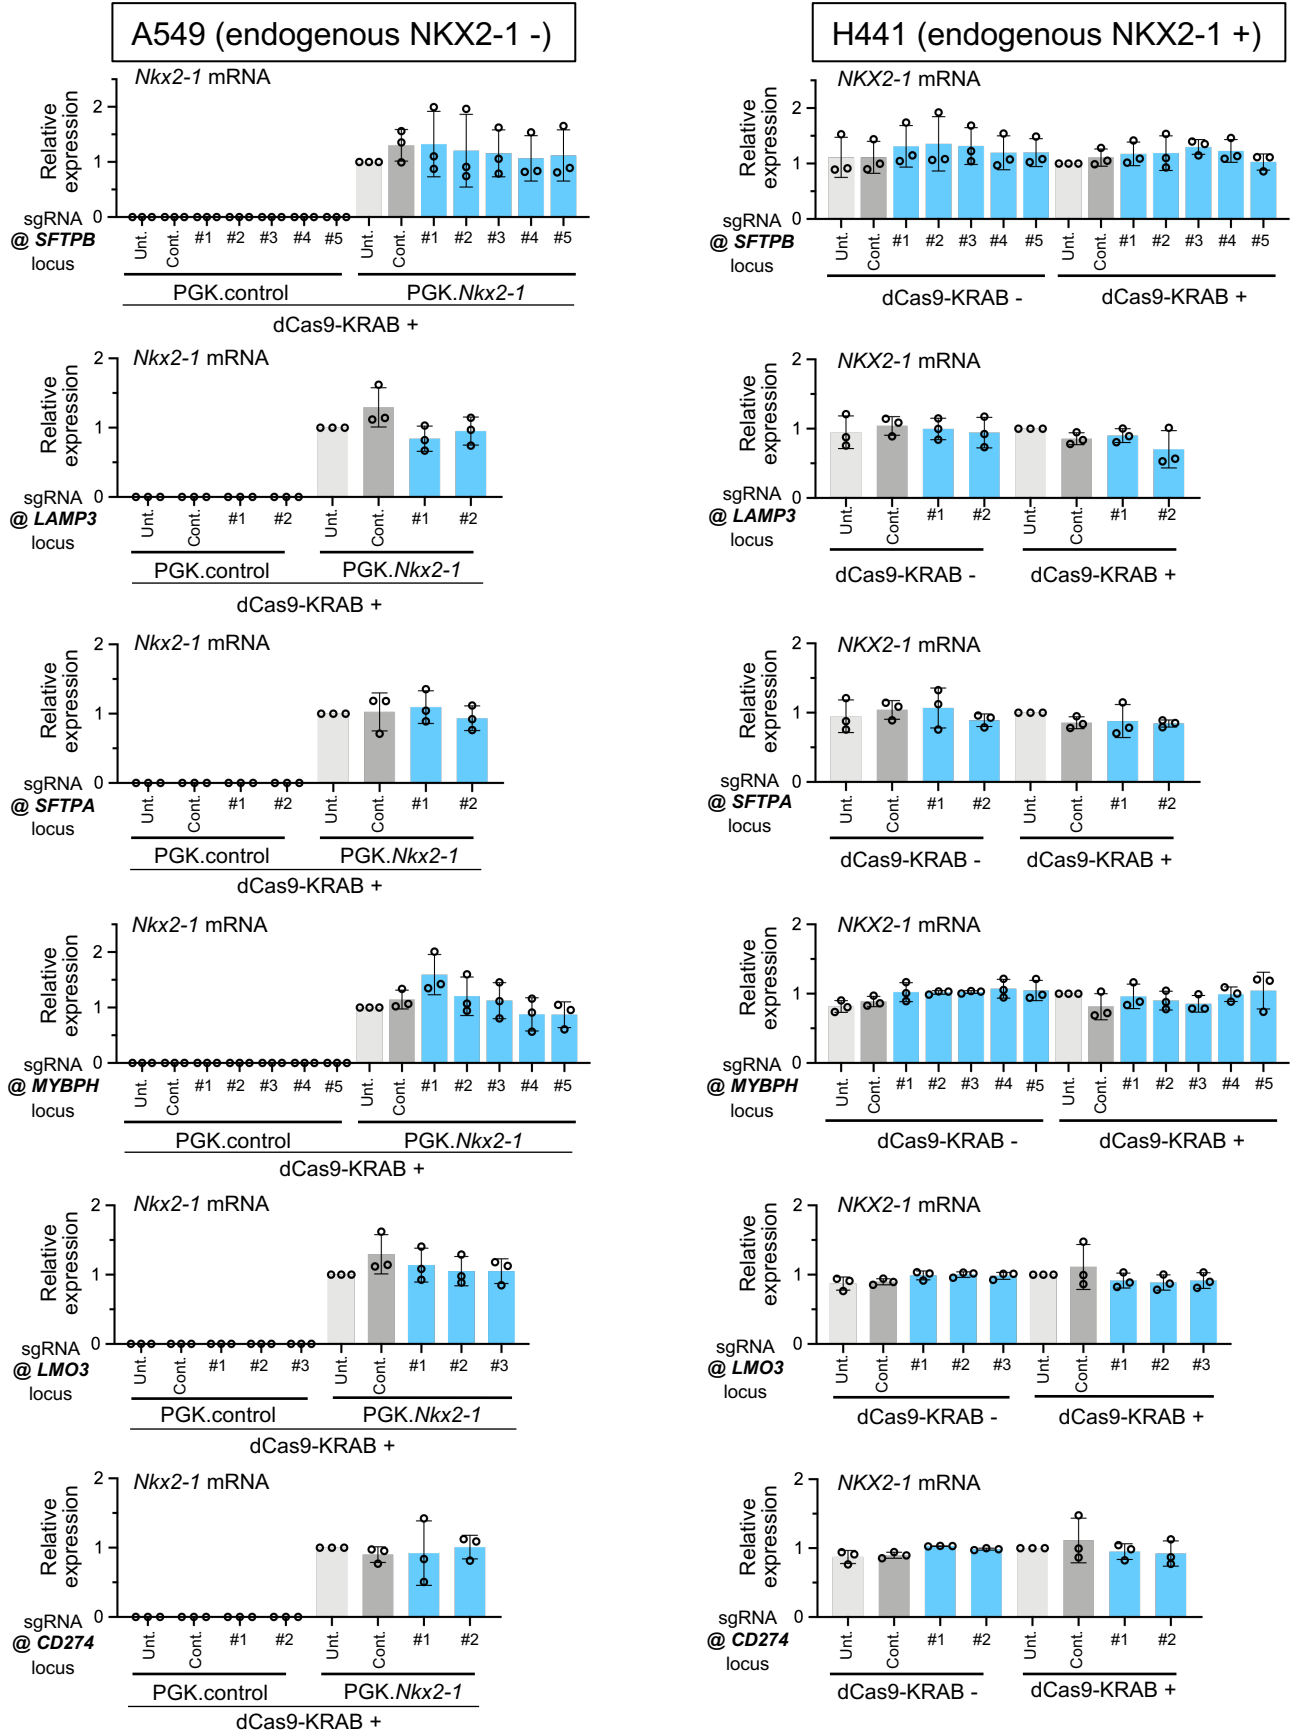

**Supplementary Fig. 1. The expression of *Nkx2-1*/*NKX2-1* is not altered by synthetic sgRNAs in the presence of dCas9-KRAB in A549 and H441 lung epithelial cells**

Shown is gene expression of rat *Nkx2-1* in A549 cells and human *NKX2-1* in H441 cells, both of which stably express dCas9-KRAB. A549 cells expressing dCas9-KRAB, which we previously created (1), were infected with lentivirus carrying rat *Nkx2-1* (PGK.*Nkx2-1*) or empty (PGK.control). Likewise, H441 cells expressing dCas9-KRAB were created. TaqMan gene expression analysis was performed using mRNA from these cells as described in Methods. The expression of *Nkx2-1*/*NKX2-1* was not influenced by indicated synthetic sgRNAs. Results are expressed as the mean  $\pm$  SD of the triplicates for each group. Unt., untransfected. Cont., non-targeted control sgRNA.

### A549 (endogenous NKX2-1 -)

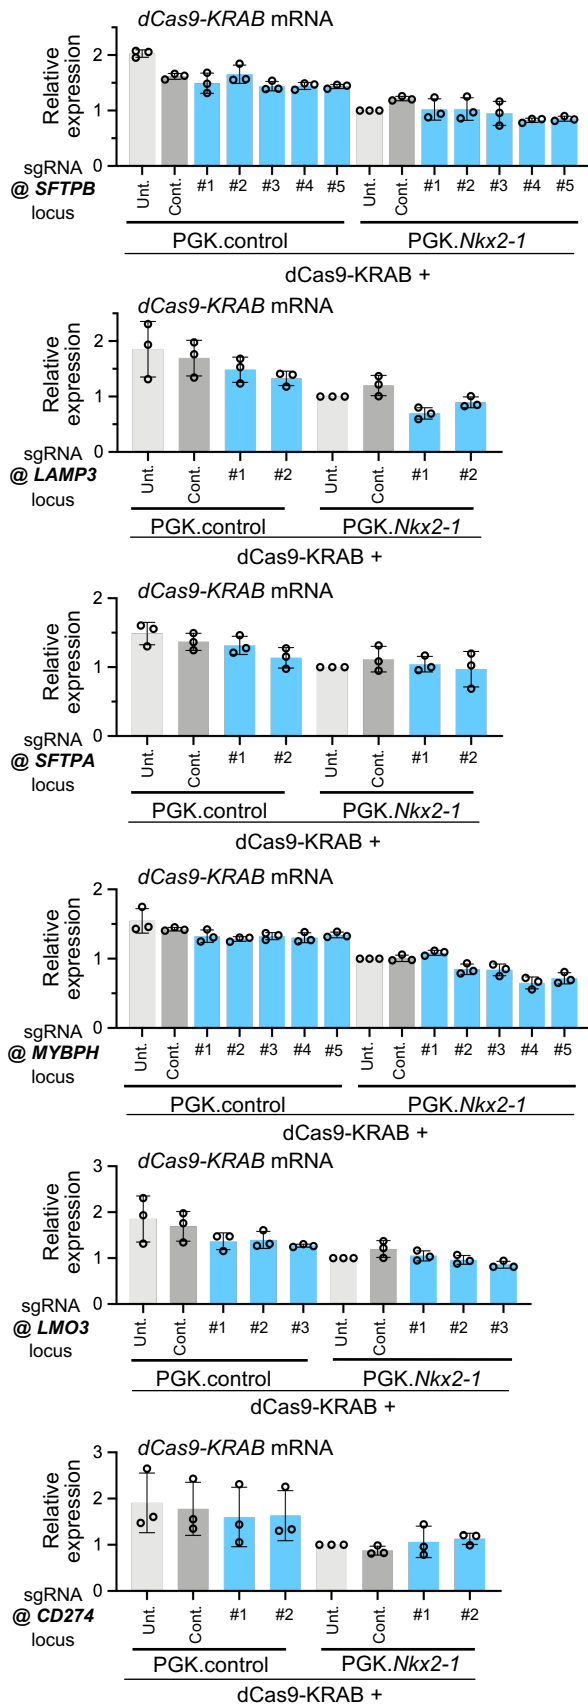

### H441 (endogenous NKX2-1 +)

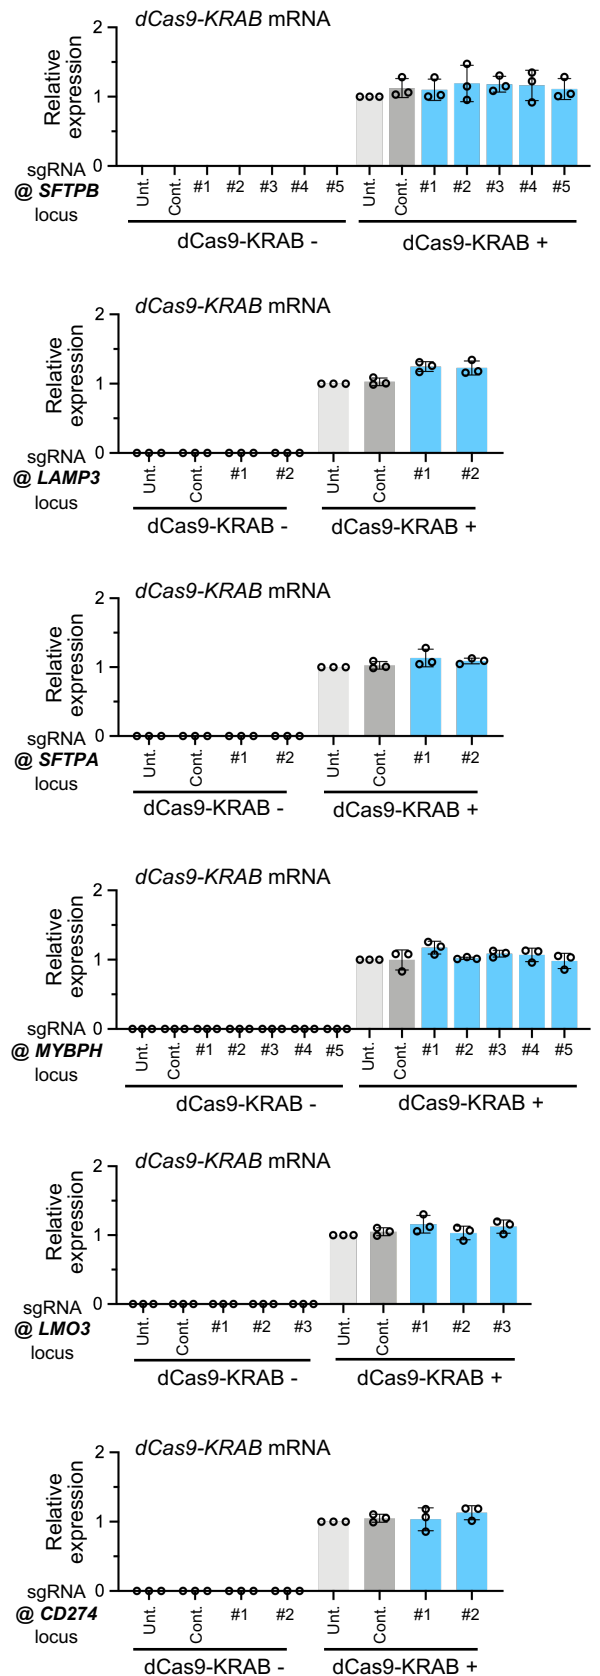

**Supplementary Fig. 2. The expression of *dCas9-KRAB* is not altered by synthetic sgRNAs in A549 and H441 lung epithelial cells**  
 Shown is gene expression of *dCas9-KRAB* in A549 cells stably expressing *dCas9-KRAB* with or without *Nkx2-1* and H441 cells stably expressing *dCas9-KRAB*. TaqMan gene expression analysis was performed using mRNA from these cells as described in Methods. *dCas9-KRAB* expression was not influenced by indicated synthetic sgRNAs. Results are expressed as the mean ± SD of the triplicates for each group. Unt., untransfected. Cont., non-targeted control sgRNA.



*LAMP3* locus

Third intronic region #1

ctccttctgtgcagccccaaaagggcttcagggcctcttatgggaga**cttg**ctggggaacgtaaccaccctg  
ccctttgcaaaccagccaaaggaggaagttgtgcagatgaata

Fifth intronic region #2

gacaatctgatatgaggaccgggagttccccaaagagactcgggcttaacagcaagag**cttg**gctttggagagctg  
tgatctccttcacct**cttcaaacctggcacctgct**ccaggtcccctgtgtccagtgtaagggcactcgaaa  
gttctgtagggcagagga**caag**gtgtttattcaccagccactcactcttctgcagaatgattaatgtaagatttacc  
ttctagcatgtggaaatttctcccctagcagatgaaa**caag**aagcagaattttaaata**caag**tatagagg

*SFTPA* (*SFTPA1* and *SFTPA2*) locus

Proximal upstream region #1

gtgcctgtgtaagggctctcggctttcactgctaaggag**cttg**ctaggggcaggggtgggtgacctcagc**caag**gggg  
ggatttctctttacagacctggagttcctctttcgcaggttctgtgctcccct**caag**gggt**ctt**tgagatcctcc  
**agcctgag**tgct**cttg**gggaaacatg

Distal upstream region #2

aggtggggagtgggggtgggtcacttccctgtgactctgc**cttg**tgataggcattttggcttct**caag**ggtoctca**cc**  
**cttg**gtactcatgtcatcagggccctgtccagcggccctcccggttccattcagggggcctgccaggcac**caag**ag  
gtgcttccgtggtaaagaagatccctct**caag**gctgtgtctcctgatgccattgacacaatggtgaagagcccatag  
gccagagg

MYBPH locus

Far distal upstream region #1

cgggactggagtcacctgcagagtg**cttg**agagatggccctccag**ccctcccagtgaggggcagccgat**tac**cttg**gaa  
gcaaccattccgtggctgggctgaaatctgtcaatagtcctagtgtgggcttagccctttgttctgttcaccct  
ccctaacaactcatccctccaccattcagagatcaaagtaacctctgt**caag**ctggcctgagataggaggtcggga  
ggatgtgat

Distal upstream region #2

ccccccaccacacagggcatctttgaaacccagggtgcaagcc**cttg**tgggcagccaactgcctccctgggg  
ccaccttccccagccggggacagggctotccagggtgactcagtgctctgtggggttagtcacattcattatag  
ctgcagagtcagaggg**caag**gatggagatccagctccaggaccact**ccctggcctggcaagacgtggagt**caccta  
gcagagggc

Proximal upstream region #3

agatggatgaggaagtgactcct**caag**ggg**cccttg**tggttctctcccccagagctattcctggcctgggogcctctc  
caccctccagtcctcctg**cttg**acctgacccccacagctgggaa

Third intronic region #4

ggggccctgtccaggatc**cttg**gctgctcagctgtctctc**cttg**gccacctggagctgc**caag**catt**cttg**acccc  
tgcagctgtccctagagcattccatgcctgagctcccagagc**caag**tgccactcagctaatt**cttcagagacaccgt**  
**gttctctt**tcactgt**cttg**tctctct

Sixth intronic region #5

acctgactccctaggaggcccttag**caag**actcttctctctctggacctcagatgcctcctgaagactgtgaagaggg  
ctggcccgggctgtctgaagccttt**caag**ttctggagccatgcttctcaaactcttaatgtccacatgagt**ccacctgg**  
**ggagcttgctaaggg**cagagtctga

*LMO3* locus

Second intronic region #1

ttgaaac**caag**ccctaa**cttg**ttgag**cttccttgaccctactgaacatc**agcctgccatc

Second intronic region #2

tttatagttttattctatgccaaaaatag**cttg**ttaggaatataaaagaaattaataaagagtagtaatacaattat  
taaaatatatatgcttttagagttcagcattcatatgaagaaatctttttaaggaaaactctgctgaaaaaaaaagtc  
ctctatctttctgttcttccctgctagataagtatcacagaaaaatctcaatgagactgatggtaagcctgttataa  
tagcaatggaatcttgagtgtttgttttaacattgtgaaagaaagtca**acagaatgaaactcagatca**ctgcaaata  
ttt**cttg**aggatttactctataatgggtagtgttataggaactgaggctccagcagttaaaaaaaaatggacagaaata  
tttgcttttatgtatcttatatcttttagtattttttcaggtattctcaatgagttatatatgtgctaagtgtgta  
cagatgtaatctctctagcc**cttg**ggaactacagtattatttaaaccatttttagagaagaaggcactgaggctgag  
g

Second intronic region #3

a**caag**cactacaaaa**caag**aattta**caag**gatctccagcttaaatggaaaagtggatctatgataactttataaacga  
g**ctgtgggagtaaaagagtgcag**ctcaagaggttta**caag**aattat



CD274/PD-L1 locus

Upstream region #1

aagat**caag**aacatttactggaaattgctccttcaccaggaatttgctcacatctcttcaggtccacttataagat**c**  
**ttg**aaatcagt**cctcctgagatcagtacaaacga**ggatcatctctcctgctttagaagcaaaagtggcaagcaggg  
agacagaggcagaaggaaggatggta

First intronic region #2

ggtgctcaatcagtgtttgctaaacgaataattagtcacattt**caag**caggatgactaatgaagaatagaatct**a**  
**ggcagatactctggaagag****ccc**ctgtgagtcattcatatctta

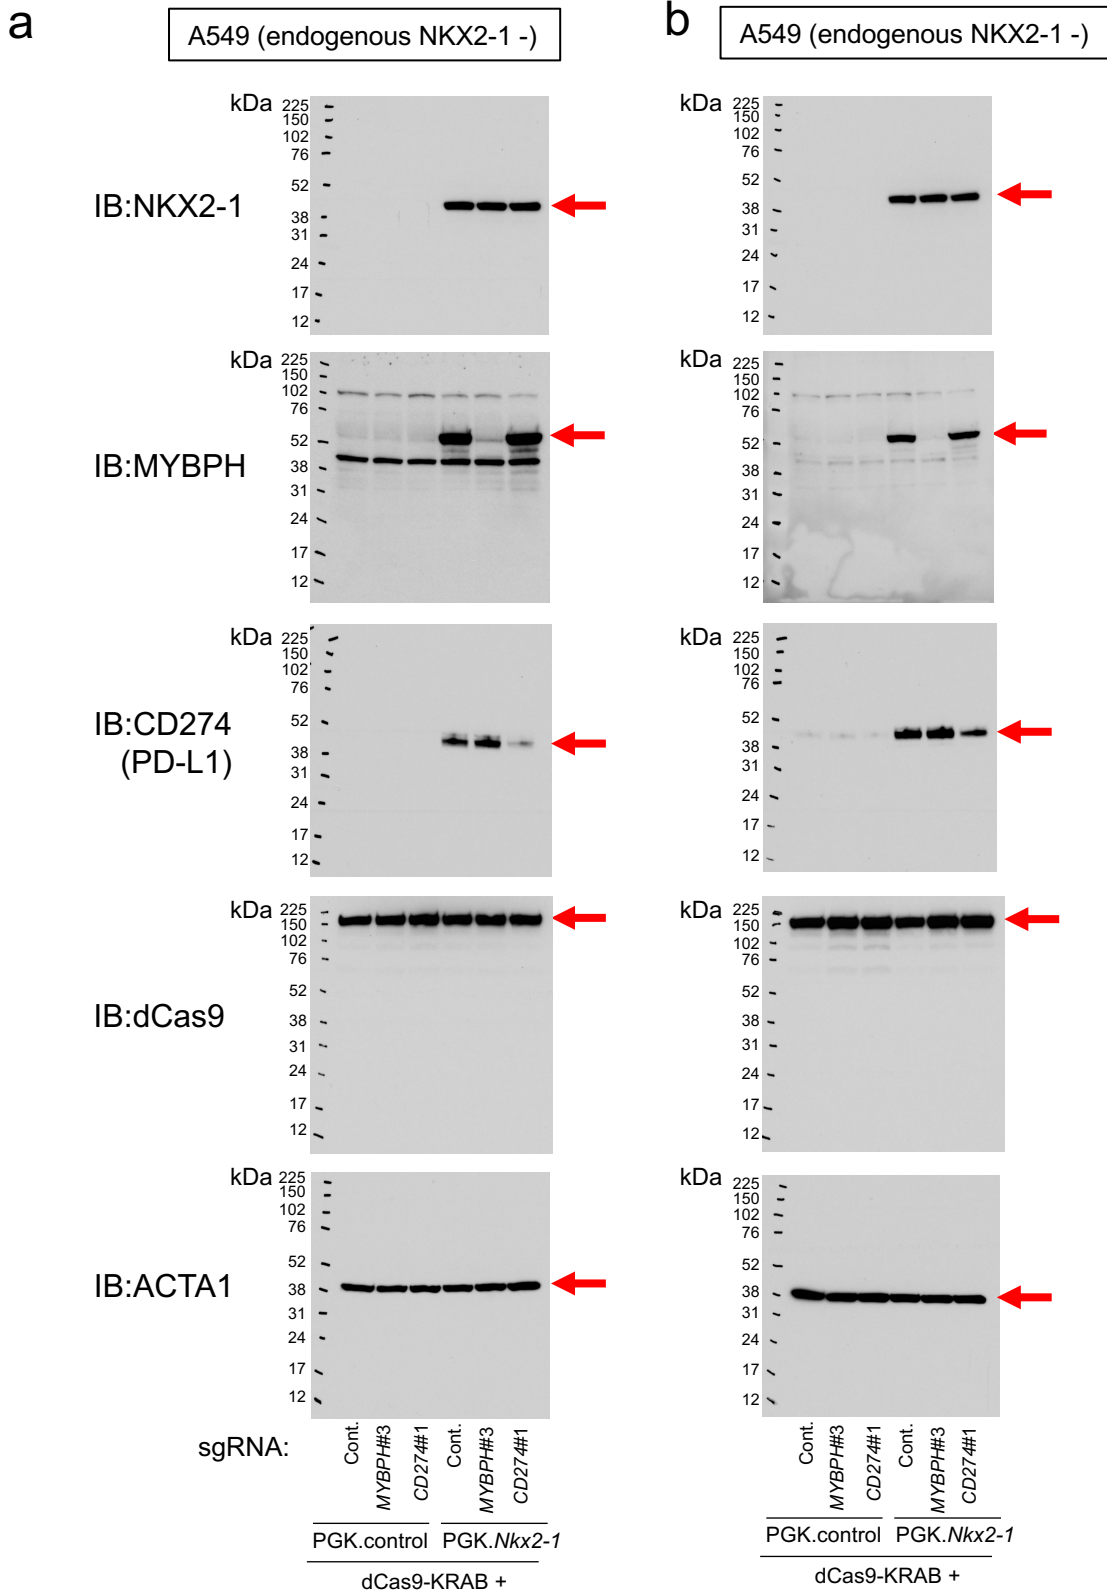

**Supplementary Fig. 4. CRISPRi targeting NKX2-1-binding sites, including ones at loci of *MYBPH* and *CD274*, represses the expression of *MYBPH* and *CD274* at the protein level in A549 lung epithelial cells that express NKX2-1**

Shown are immunoblots of indicated proteins using protein extracts from A549 cells with or without NKX2-1 (PGK.rat *Nkx2-1* or PGK.control) that were performed independently twice (a and b). Red arrows indicate protein bands targeted by antibodies specific to the proteins. ACTA1 was used as a loading control. SgRNAs used in this analysis are indicated at the bottom. Cont., non-targeted control sgRNA.

A549 (endogenous NKX2-1 -)

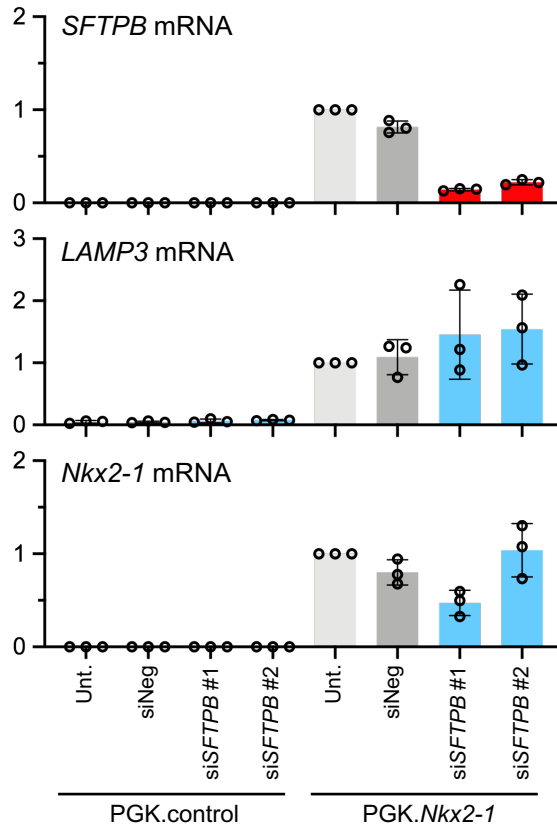

**Supplementary Fig. 5. The expression of *SFTPb* does not affect the expression of *LAMP3* in A549 lung epithelial cells that express *Nkx2-1***

Shown is the expression of *Nkx2-1* and its downstream target genes, *SFTPb* and *LAMP3*, in A549 cells with or without *Nkx2-1* (lentiviral PGK.*Nkx2-1* or PGK.control, respectively), which were transiently transfected with two independent siRNAs targeting endogenous *SFTPb* (siSFTPb #1 or siSFTPb #2) or non-targeted negative control siRNA (siNeg). Unt. indicates untransfected. The data points are obtained from three independent experiments as described in Methods. Results are expressed as the mean  $\pm$  SD of the triplicates for each group. Only  $P < 0.05$  and more than 2-fold suppression are considered significant siRNA-mediated suppression (highlighted in red).

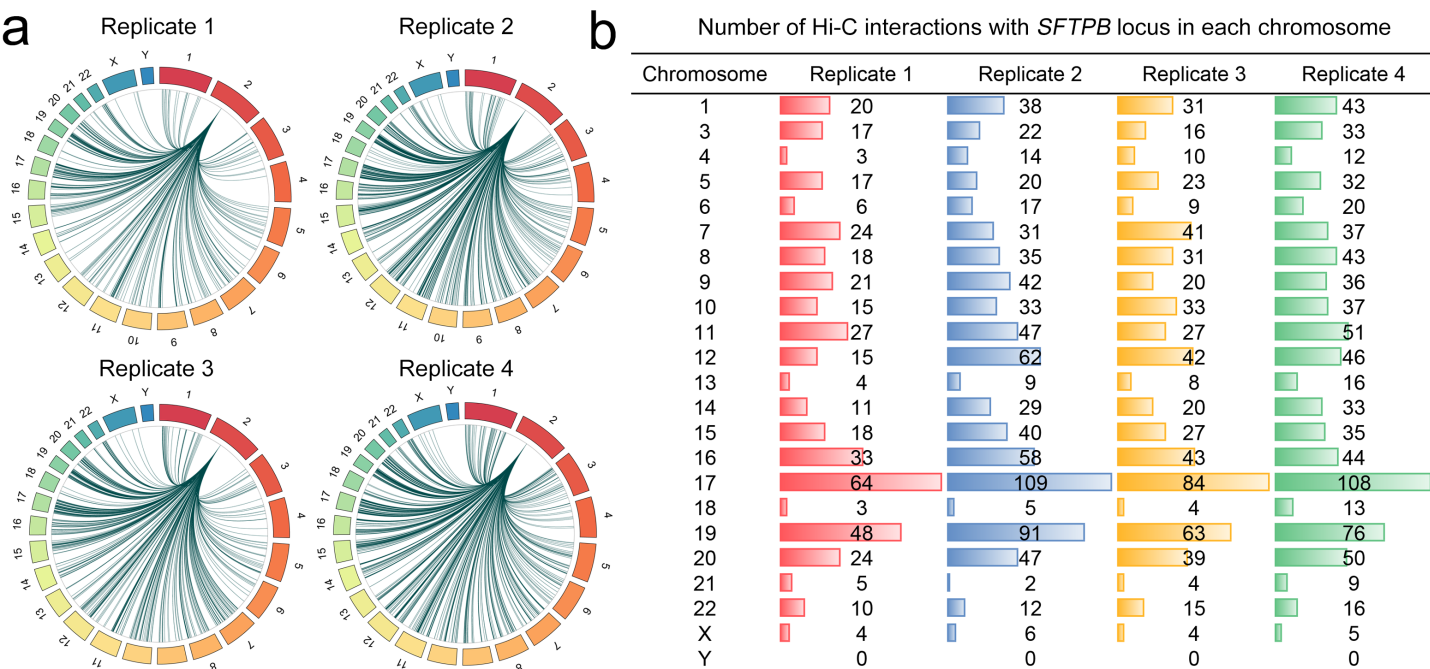

**Supplementary Fig. 6. The locus of human *SFTPb* on chromosome 2 interacts with genomic regions located on different chromosomes in A549 lung epithelial cells**

**a.** Shown are Hi-C data of four isogenic replicates that indicate the interaction of the *SFTPb* locus with genomic regions located on different chromosomes. Hi-C data were obtained from ENCODE.

**b.** Shown are distributions of inter-chromosomal interactions in individual Hi-C data replicates. Inter-chromosomal interactions with the *SFTPb* locus (including 10 kb upstream of transcription start site and 10 kb downstream of transcription end site) were extracted at the resolution of 50 kb. Interactions with at least 2 observed counts were included in the analysis.

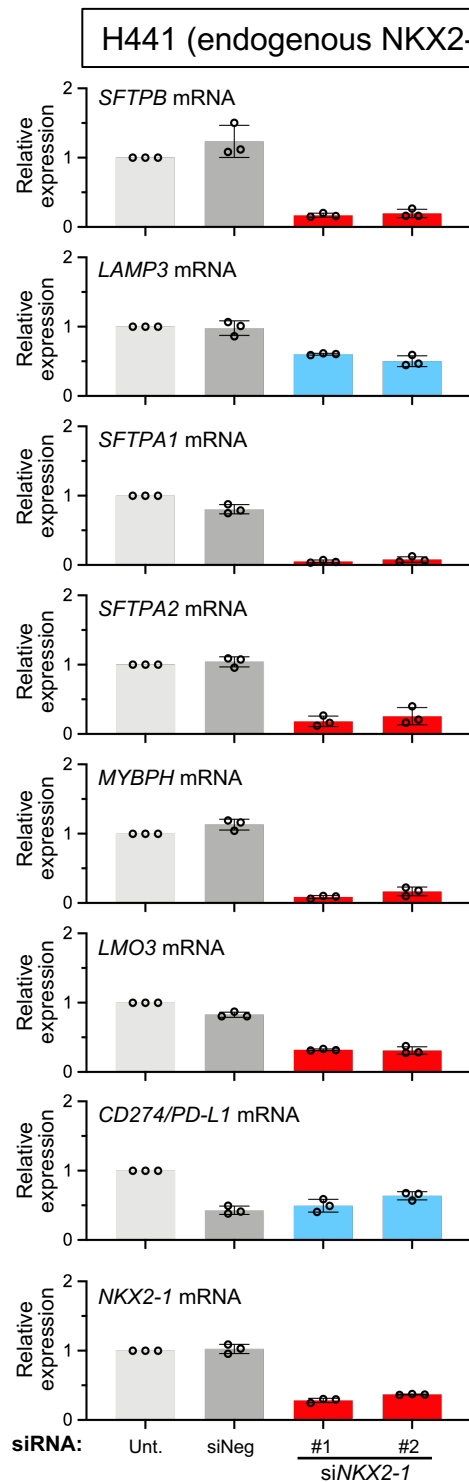

**Supplementary Fig. 7. SiRNA-mediated suppression of *NKX2-1* indicates that *NKX2-1* is required for the expression of *SFTPB*, *SFTPA1*, *SFTPA2*, *MYBPH* and *LMO3* in H441 lung epithelial cells**

Shown is the expression of endogenous *NKX2-1* and genes in H441 cells, which are induced by rat *Nkx2-1* in A549 lung epithelial cells, transfected with two independent siRNAs (#1 and #2) targeting endogenous *NKX2-1*. siNeg is a negative control siRNA and Unt. indicates untransfected. The data points are obtained from three independent experiments as described in Methods. Of note, the expression of *LAMP3* and *CD274/PD-L1* is regulated by *NKX2-1* in A549 cells but not in H441 cells. Results are expressed as the mean  $\pm$  SD of the triplicates for each group. Only  $P < 0.05$  and more than 2-fold suppression are considered significant siRNA-mediated suppression (highlighted in red).

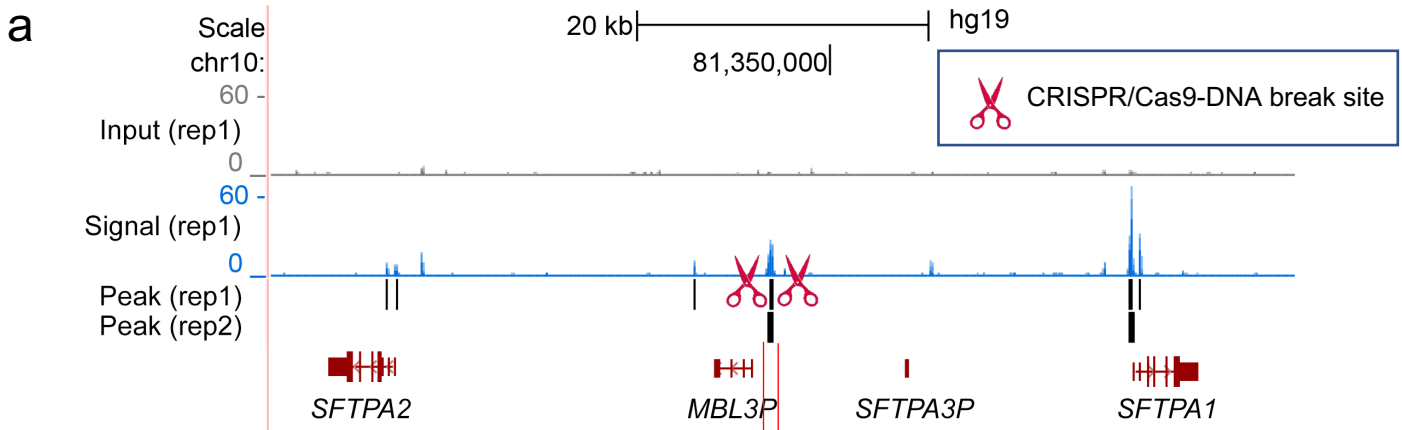

**b**

```

atcctccagcagtggtcctcaaatcagccctcttctctctggtg
agctaccatctgtgcccccttaccagtgatctcacttttctattct
cagttcacctctctgtcccagggtgcaaccagggtgggcacaca
ggaggactgggtgtaggggagaggagaaaggcagagacctcaagcag
acacagaccatctgtgtctc/

ctcaggcctgagttccagaagcgtccagttcttgctgccagagcct
agtcaagctgcccagggtccggatacagatctttgatgcttgctctcc
tccaaactcacaccattctttgaaacacttcacatgcaccaaacagc
ttgagaagtgttttccagggtgggagtggggtgggtcacttcc
ctgtgactctgcttgataggcattttggtcttcaagggtctctc
acccttggtgactcatgtcatcagccctgtccagcggccctcccg
tcccattcaggggctgccaggcaccaagaggtgcttcctggtgta
aagaagatccctctcaaggctgtgtctctgatgcccattgacacaat
gttgaagagccataggccagaggacaaggactttcaattcgtc
agcaaataggcagacctctgaggaaggtgggaatgtgaaactgacag
atttgcttgaccagatgctaacctgctgcagaggttag

/agaagggtggtttgagcgggaagaggttagacaggaagtaatac
acctaggagcaaaggaacctgagaaagcctggattctggaggggata
agattatcccccaaggatgtgtaccataggtctgctctcataga
cctggggatga
  
```

CRISPR/Cas9 -deleted region

NKX2-1-binding motif: **cttg** or **caag**  
 sgRNA sequence for Cas9: xxxxxxxxxxxxxxxxxxxxxx  
 sgRNA sequence for dCas9-KRAB: xxxxxxxxxxxxxxxxxxxxxx  
 PAM sequence: xxx  
 Underline: PCR primer sequence  
 /: CRISPR/Cas9-DNA break site

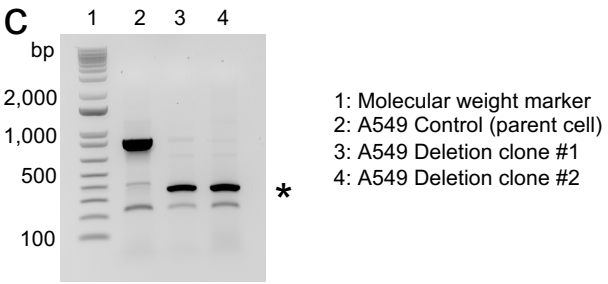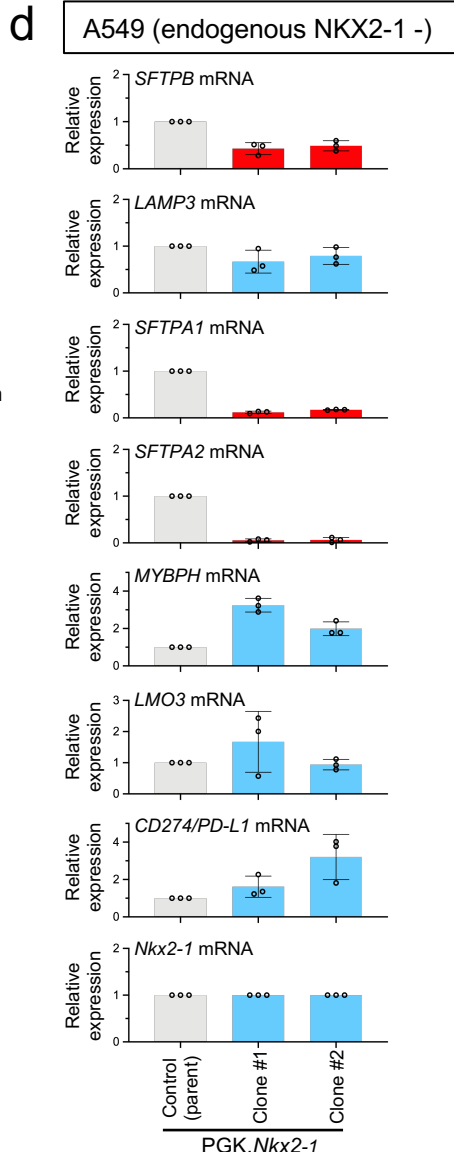

**Supplementary Fig. 8. CRISPR/Cas9-mediated deletion of an NKX2-1-binding region located at an intergenic region between *SFTPA1* and *SFTPA2* represses the expression of *SFTPA1* and *SFTPA2* in A549 lung epithelial cells**

**a.** Shown is ChIP-seq data indicating that NKX2-1 binds to an intergenic region of human *SFTPA1* and *SFTPA2*. Significant ChIP-seq peaks are described as in Fig. 5a. *MBL3P* and *SFTPA3P* are pseudogenes. The region of CRISPR/Cas9-mediated deletion is indicated by two scissors.

**b.** Shown is the sequence of genomic DNA that is deleted by CRISPR/Cas9. SgRNA sequence information is indicated.

**c.** Deletion was confirmed by PCR amplification using primers described in b. \* indicates the deletion. Two independent clones were obtained as described in Methods.

**d.** Shown is gene expression analyzed as described in Fig. 2b using mRNA obtained from A549 cells (described in c) that were infected with lentivirus carrying rat *Nkx2-1*. Expression was normalized to the expression of *GAPDH* and *Nkx2-1*. Statistical significance was determined using Student's *t*-test with Welch's correction for unequal variances. Results are expressed as the mean  $\pm$  SD of the triplicates for each group. Only  $P < 0.05$  and more than 2-fold suppression are considered significant (highlighted in red).

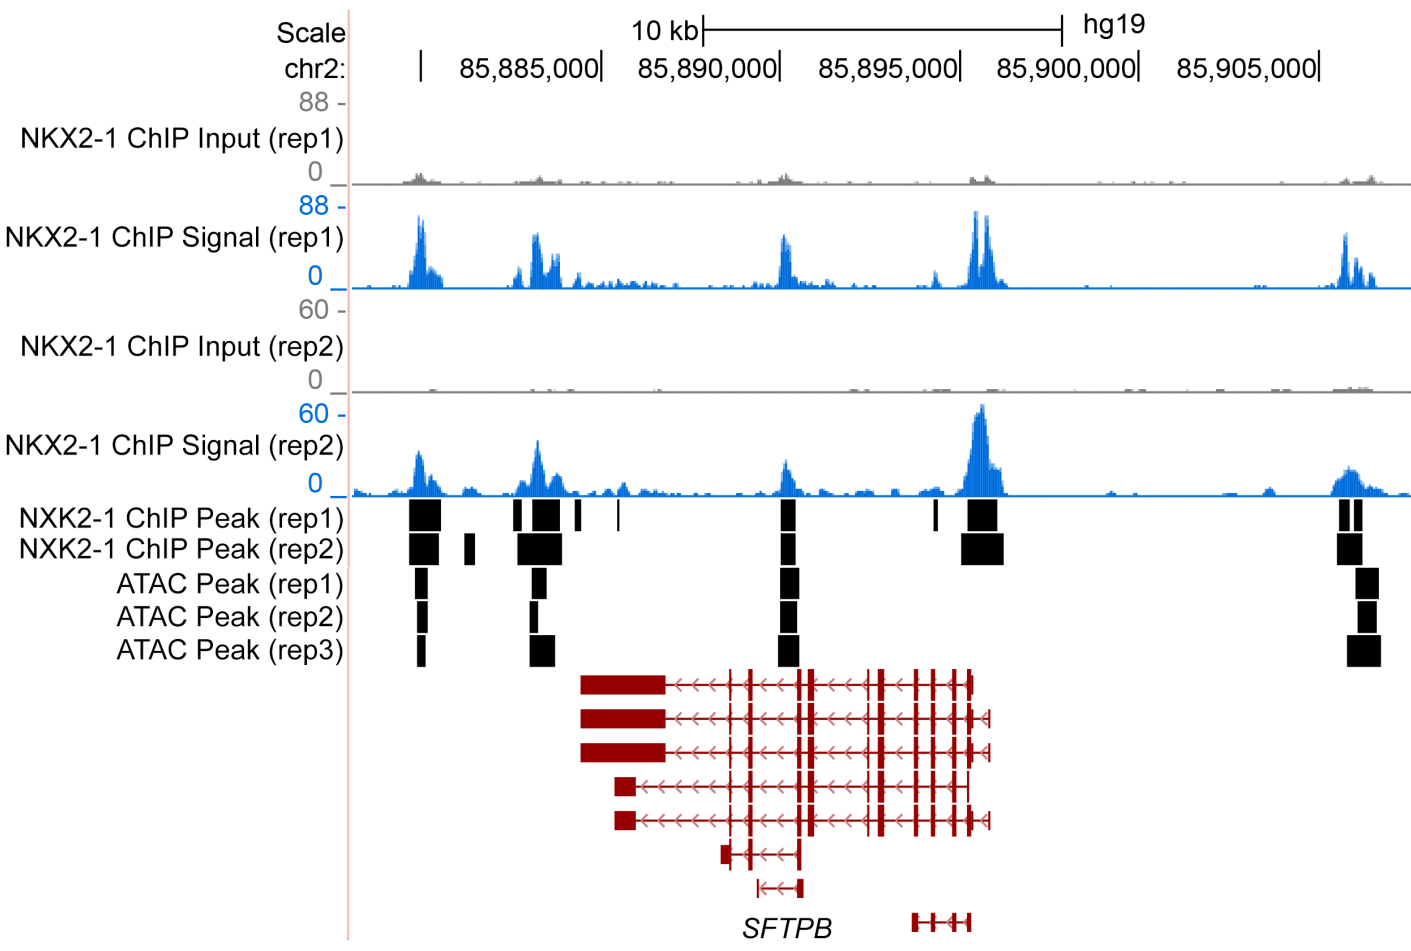

**Supplementary Fig. 9. NKX2-1-binding sites at the human *SFTPb* locus were identified by two independent ChIP-seq analyses**  
 Shown are ChIP-seq and ATAC-seq data from two or three independent experiments along with different isoforms of *SFTPb* as described in Fig. 2a.

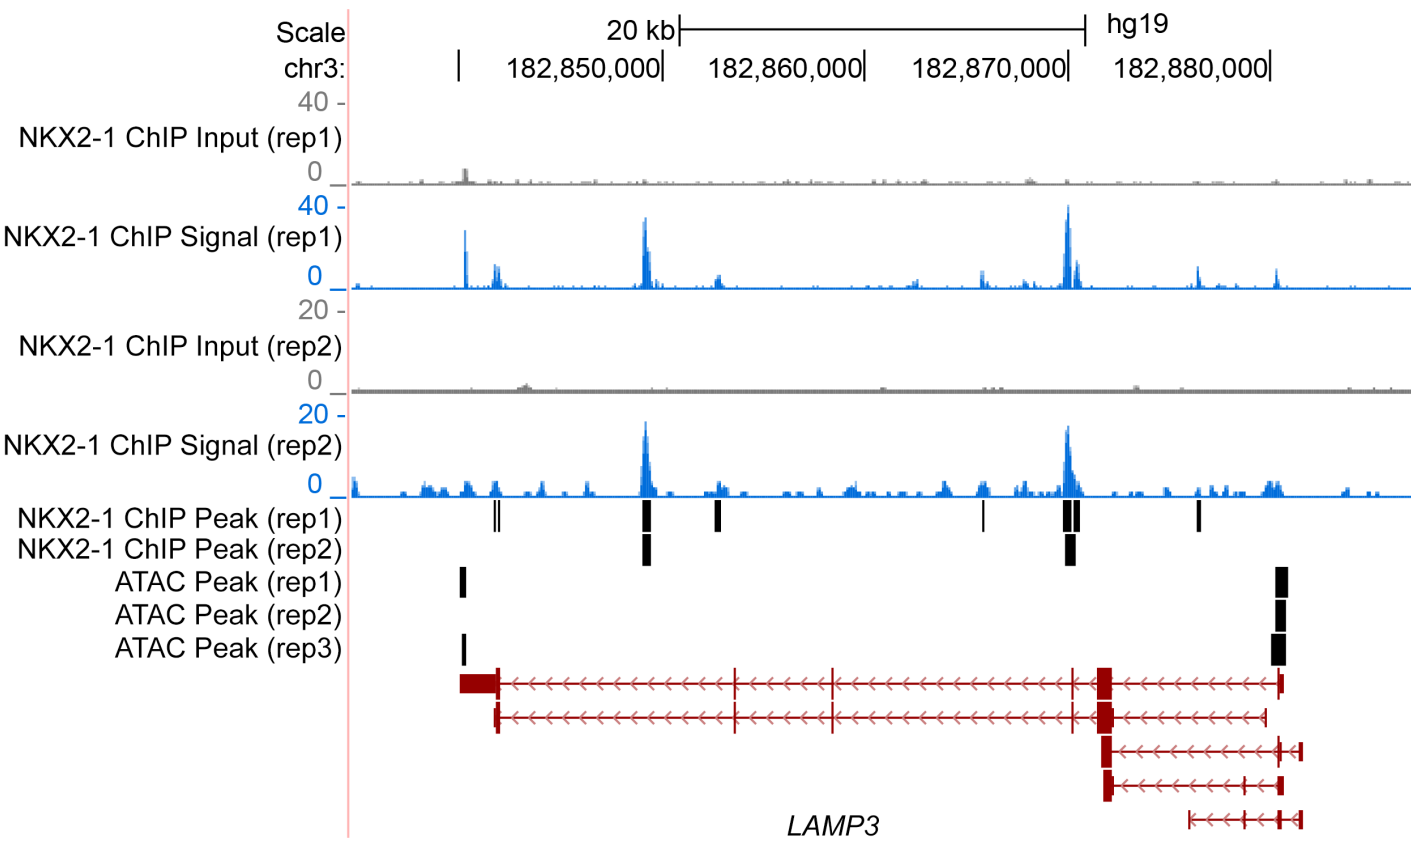

**Supplementary Fig. 10. NKX2-1-binding sites at the human *LAMP3* locus were identified by two independent ChIP-seq analyses**  
Shown are ChIP-seq and ATAC-seq data from two or three independent experiments along with different isoforms of *LAMP3* as described in Fig. 4a.



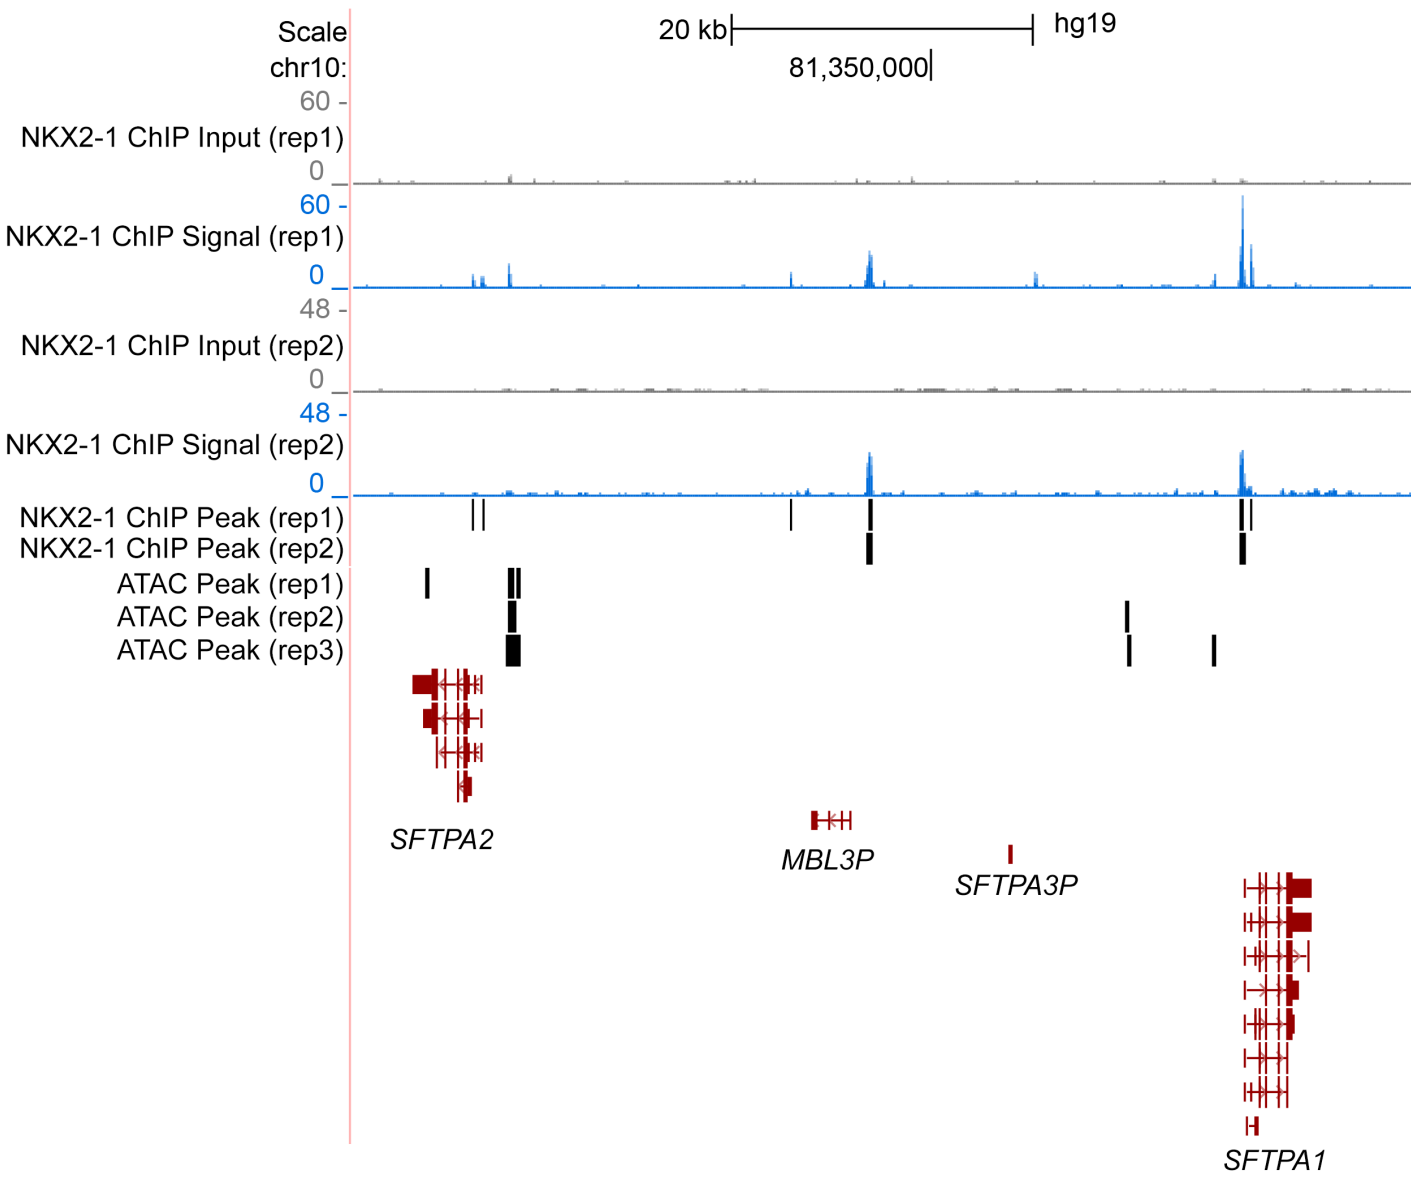

**Supplementary Fig. 11. NKX2-1-binding sites at the human *SFTPA* locus were identified by two independent ChIP-seq analyses**  
 Shown are ChIP-seq and ATAC-seq data from two or three independent experiments along with different isoforms of *SFTPA1* and *SFTPA2* as described in Fig. 5a. *MBL3P* and *SFTPA3P* are pseudogenes.

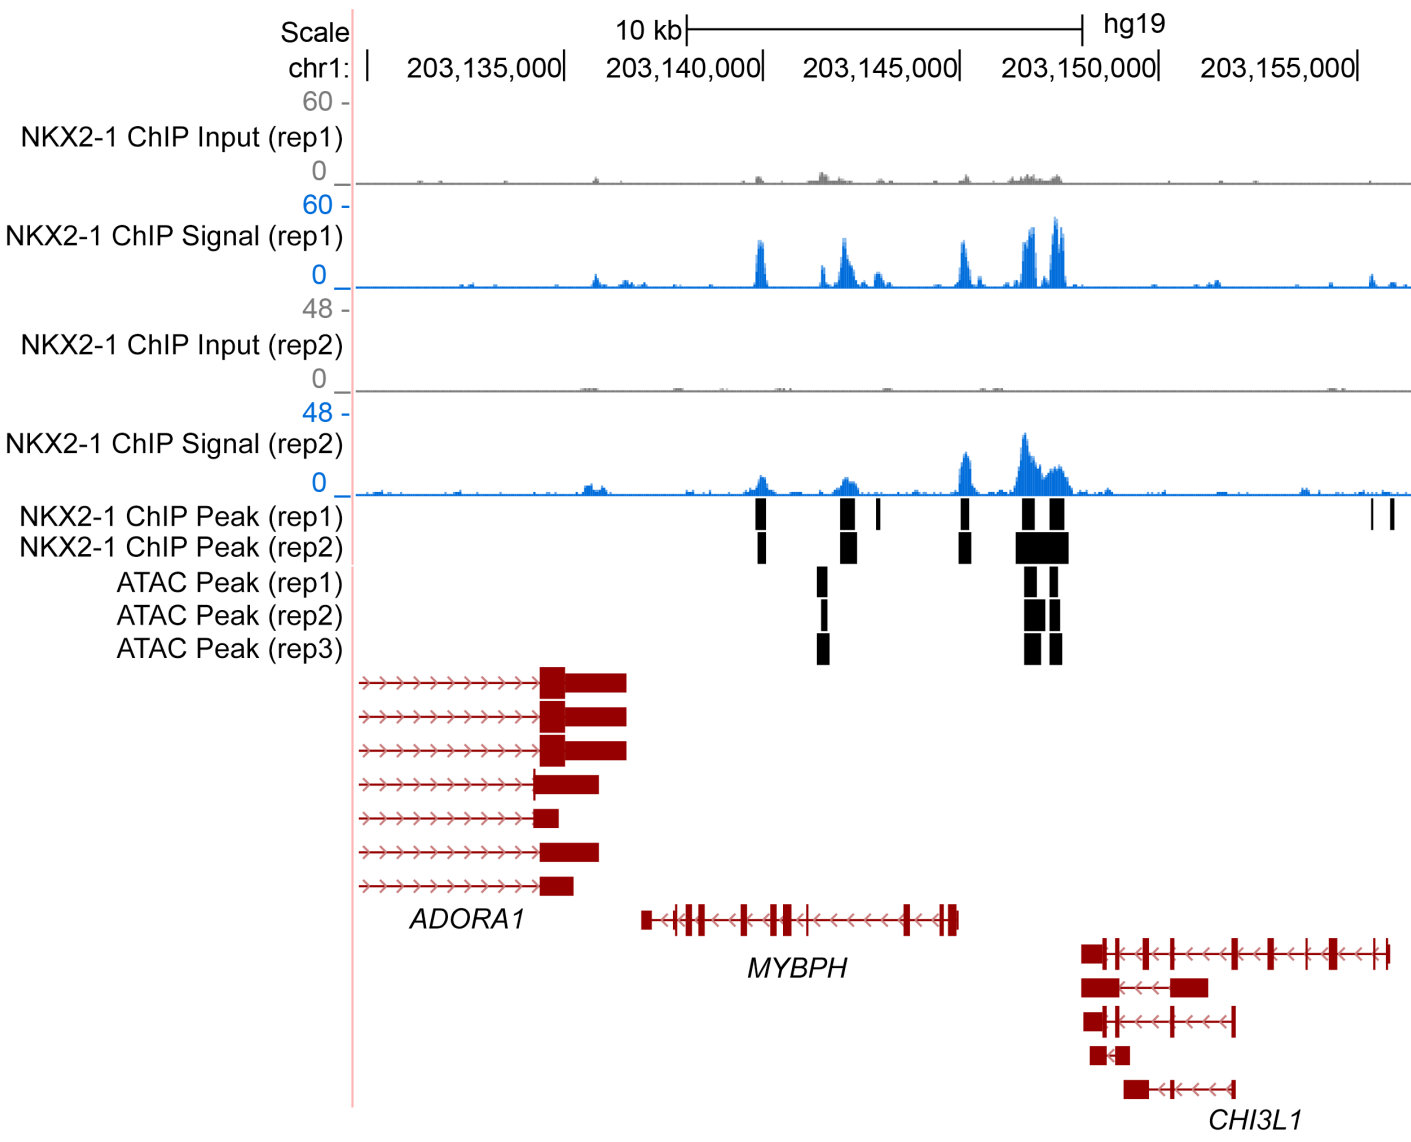

**Supplementary Fig. 12. NKX2-1-binding sites at the human *MYBPH* locus were identified by two independent ChIP-seq analyses**  
 Shown are ChIP-seq and ATAC-seq data from two or three independent experiments along with different isoforms of *MYBPH* as described in Fig. 6a.

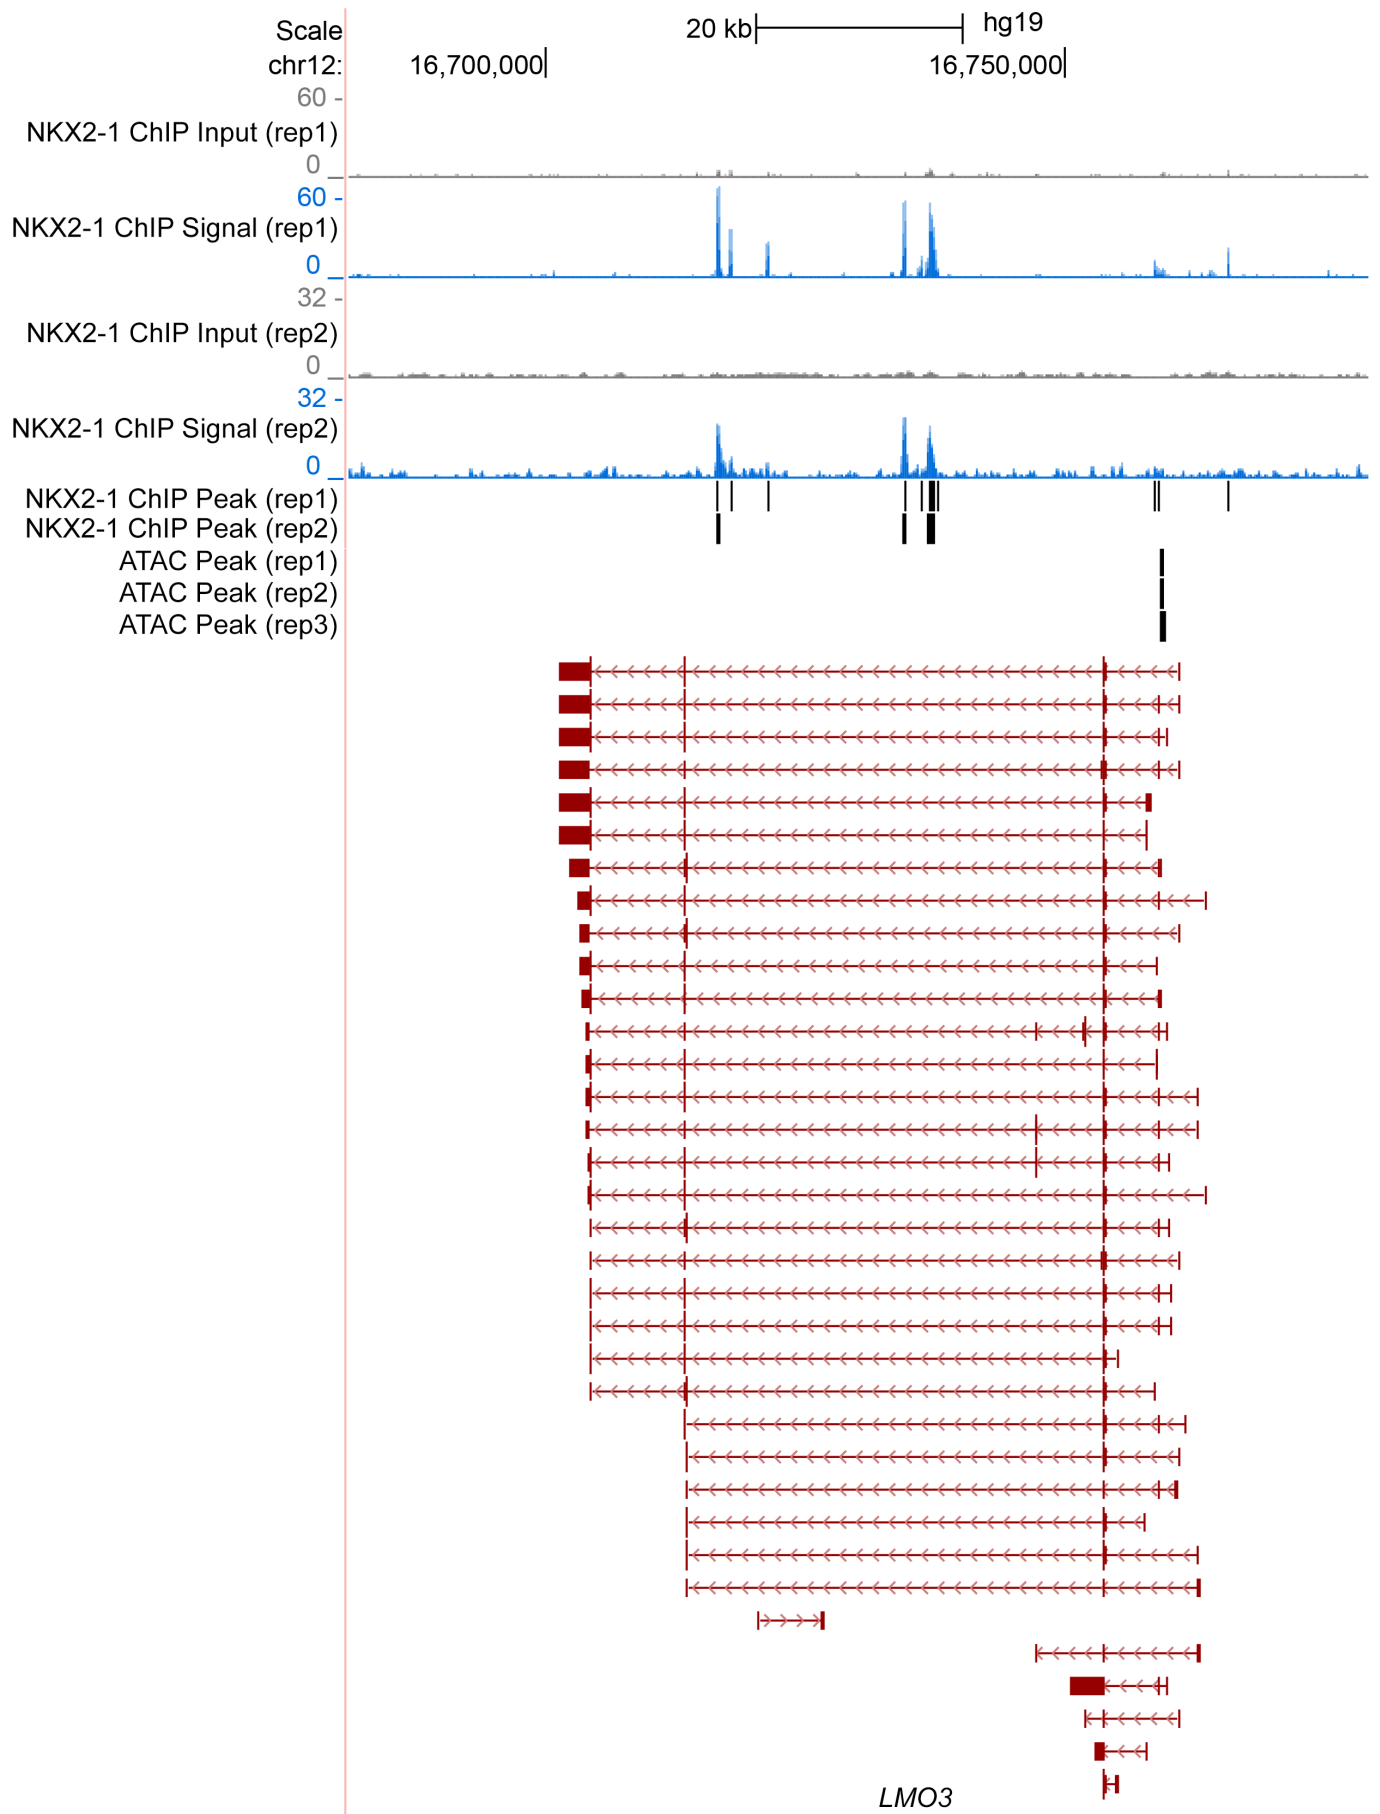

**Supplementary Fig. 13. NKX2-1-binding sites at the human *LMO3* locus were identified by two independent ChIP-seq analyses**  
 Shown are ChIP-seq and ATAC-seq data from two or three independent experiments along with different isoforms of *LMO3* as described in Fig. 7a.

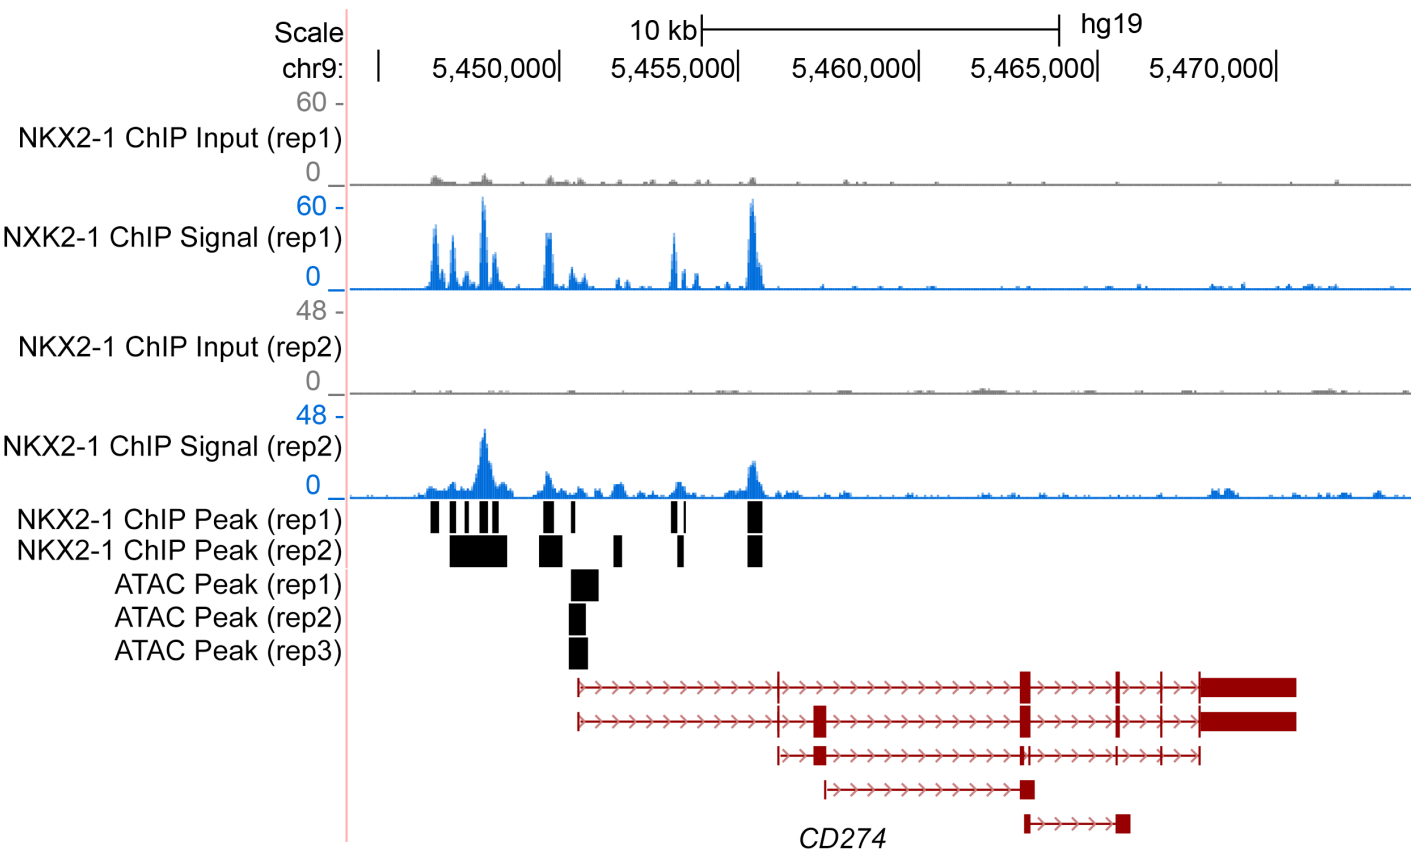

**Supplementary Fig. 14. NKX2-1-binding sites at the human *CD274/PD-L1* locus were identified by two independent ChIP-seq analyses**  
 Shown are ChIP-seq and ATAC-seq data from two or three independent experiments along with different isoforms of *CD274* as described in Fig. 8a.

## Supplementary Reference

1. Stuart WD, Guo M, Fink-Baldauf IM, Coleman AM, Clancy JP, Mall MA, Lim FY, Brewington JJ, Maeda Y. CRISPRi-mediated functional analysis of lung disease-associated loci at non-coding regions, NAR Genom Bioinform. 2020 June;2(2):lqaa036. doi: 10.1093/nargab/lqaa036.
