# Supplementary material for: CRISPRi-mediated functional analysis of NKX2-1-binding sites in the lung
Source: PubMed Central journal article supplement (PMC8115294; doi:10.1038/s42003-021-02083-4), 2021-05-12
Supplement: 42003_2021_2083_MOESM2_ESM.pdf [file 42003_2021_2083_MOESM2_ESM.pdf]

## Description of additional supplementary files

**File name:** Supplementary Data 1 – 9

**Description:** Supplementary datasets associated with this article. Each dataset is a separate worksheet within the Excel file.

**Supplementary Data 1:** Overlaps of NKX2-1 ChIP-seq peaks and/or ATAC-seq peaks in A549 lung epithelial cells

**Supplementary Data 2:** Results of DESeq2 differential expression analysis (Non-targeted synthetic sgRNA vs. synthetic sgRNA targeting first intron of *SFTP B* [#2])

**Supplementary Data 3:** CRISPOR-mediated predicted matches sorted by cutting frequency determination off-target score for *SFTP B* locus

**Supplementary Data 4:** CRISPOR-mediated predicted matches sorted by cutting frequency determination off-target score for *LAMP3* locus

**Supplementary Data 5:** CRISPOR-mediated predicted matches sorted by cutting frequency determination off-target score for *SFTP A* locus

**Supplementary Data 6:** CRISPOR-mediated predicted matches sorted by cutting frequency determination off-target score for *MYBPH* locus

**Supplementary Data 7:** CRISPOR-mediated predicted matches sorted by cutting frequency determination off-target score for *LMO3* locus

**Supplementary Data 8:** CRISPOR-mediated predicted matches sorted by cutting frequency determination off-target score for *CD274/PD-L1* locus

**Supplementary Data 9:** Raw numbers and exact P values to generate bar graphs
